# Supplementary material
Source: PubMed Central journal article supplement (PMC3436514)

Studies on 2, 4 dienoyl CoA reductase (DCR) sheds new light on peroxisomal  $\beta$ -oxidation of unsaturated fatty acids

**Tian Hua**<sup>1,&</sup>, **Dong Wu**<sup>1,2,&</sup>, **Wei Ding**<sup>1</sup>, **Jiangyun Wang**<sup>1</sup>, **Neil Shaw**<sup>3†</sup>, and **Zhi-Jie Liu**<sup>1,2†</sup>

<sup>1</sup> National Laboratory of Biomacromolecules, Institute of Biophysics, Chinese Academy of Sciences, Beijing 100101, China.

<sup>2</sup> Institute of Molecular and Clinical Medicine, Kunming Medical University, Kunming 650500, China

<sup>3</sup> Tianjin Key Laboratory of Protein Science, School of Life Sciences, Nankai University, Tianjin 300071, China.

<sup>&</sup>equal contribution

Correspondence: [zjliu@ibp.ac.cn](mailto:zjliu@ibp.ac.cn) or [neilshaw@moon.ibp.ac.cn](mailto:neilshaw@moon.ibp.ac.cn)

## **Legends to supplemental Figure S1**

### **Supplemental Fig. S1**

Sequence alignment of homologs of pDCR deposited in PDB. Secondary structural annotations are of pDCR. Conservation is colored according to Clustal W.

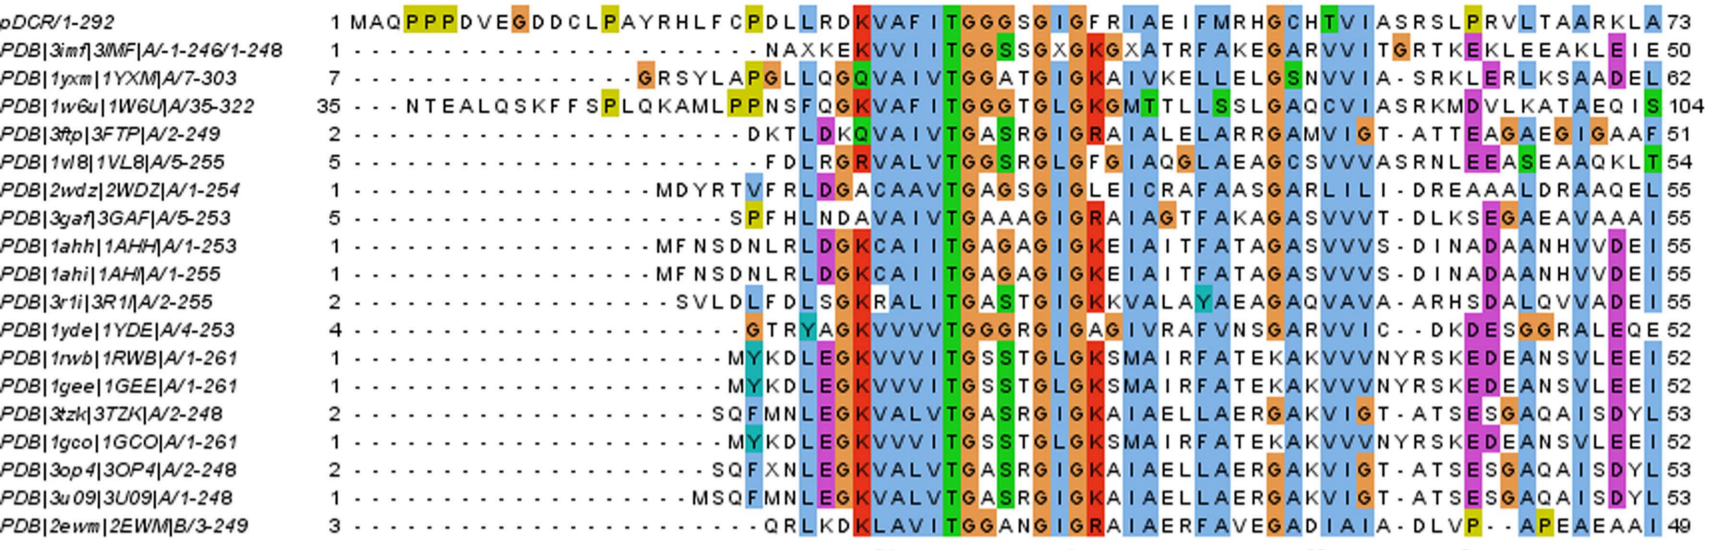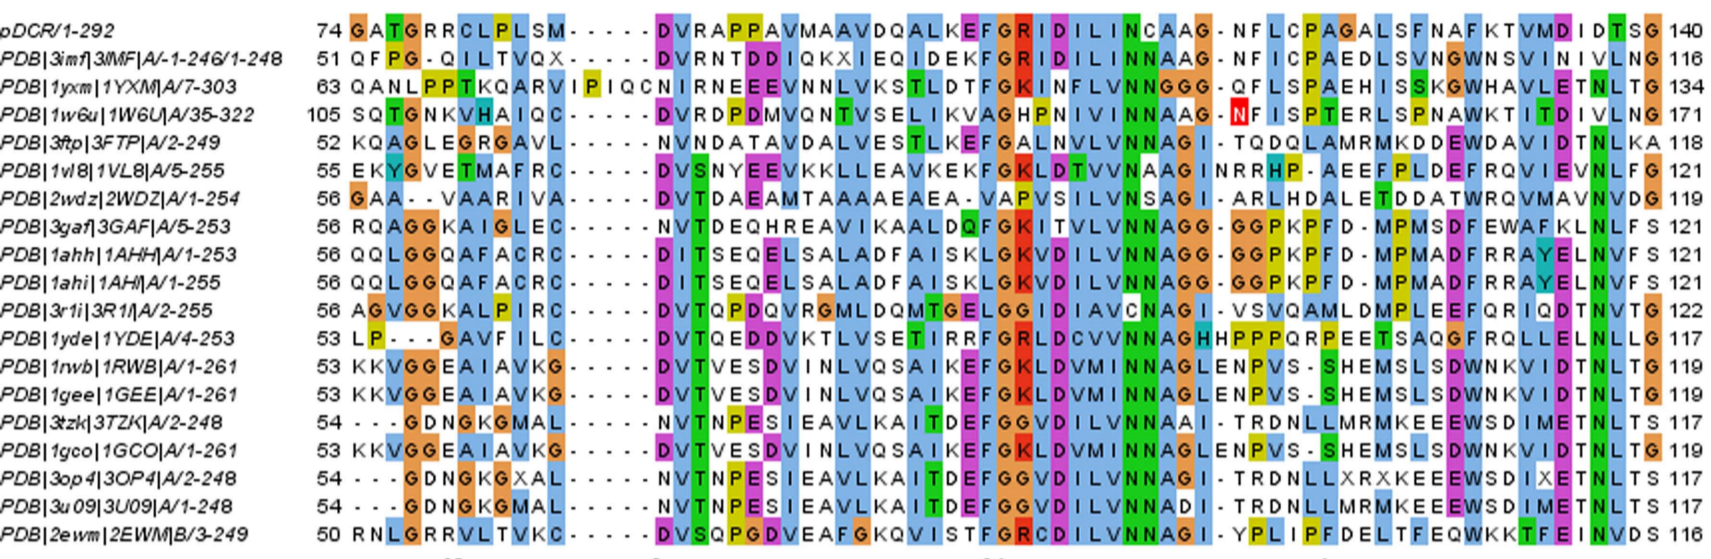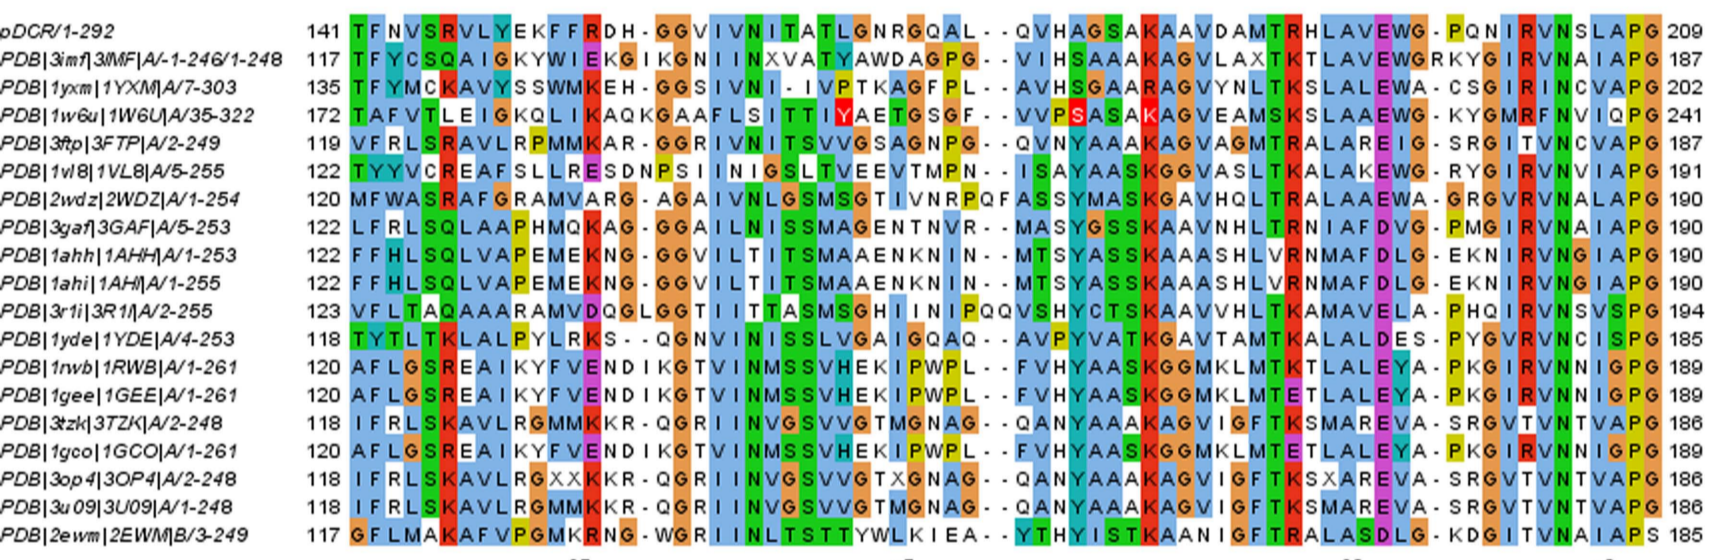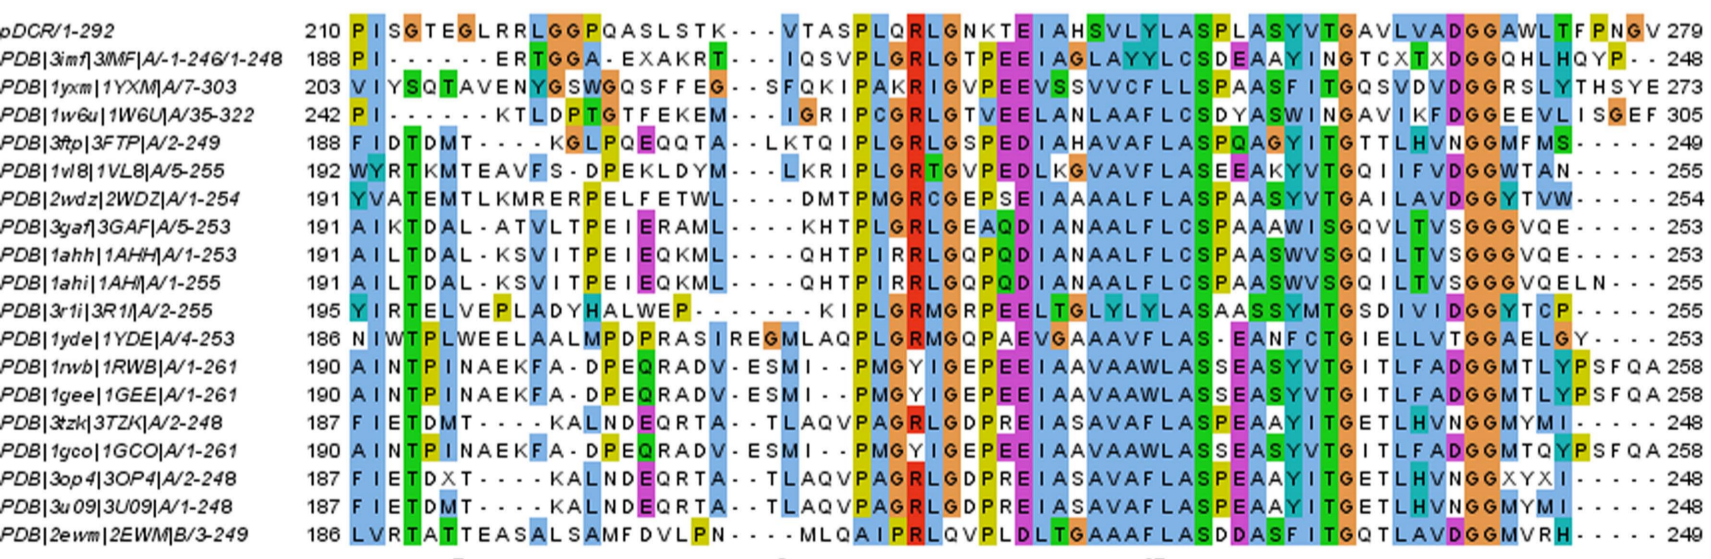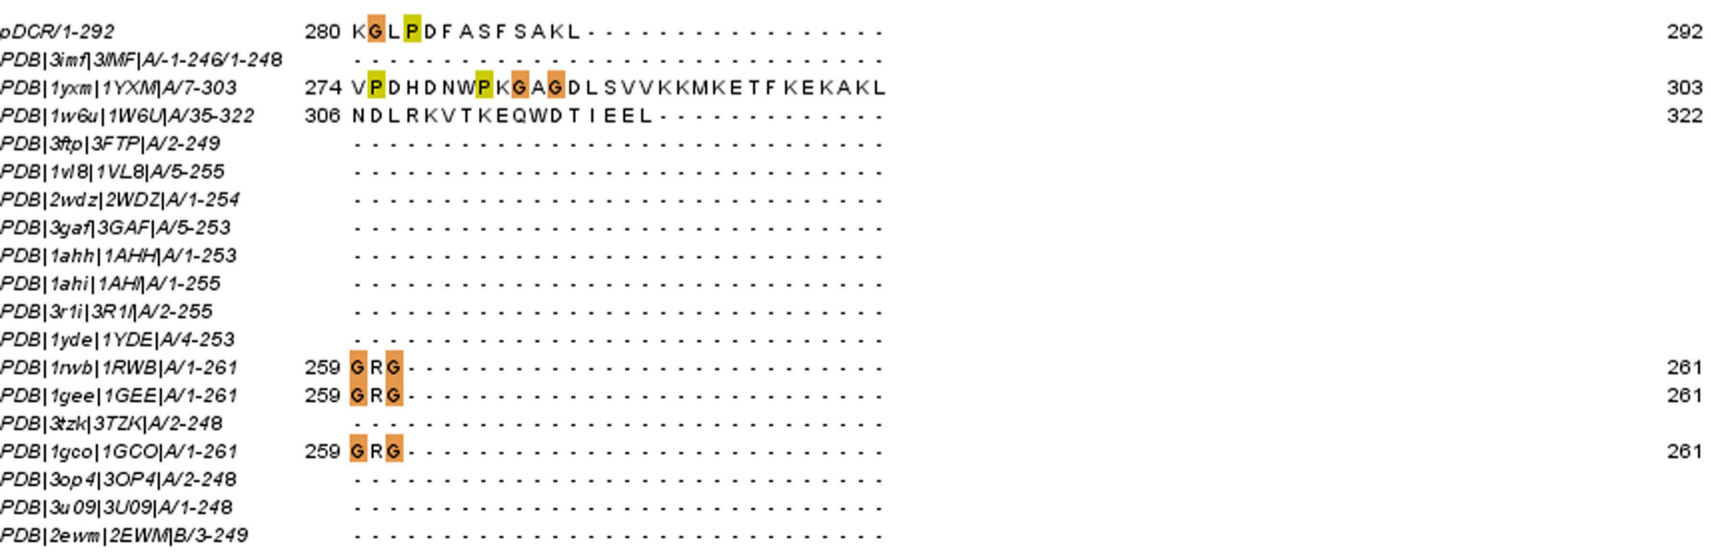

Supplement: supp_M112.385351_jbc.M112.385351-1.pdf [file supp_M112.385351_jbc.M112.385351-1.pdf]
